# Lie Symmetry Analysis and Explicit Solutions of the Time Fractional Fifth-Order KdV Equation

Gang wei Wang<sup>1\*</sup>, Tian zhou Xu<sup>1</sup>, Tao Feng<sup>2</sup>

<sup>1</sup> School of Mathematics and Statistics, Beijing Institute of Technology, Beijing, PR China, <sup>2</sup> School of Electrical Engineering, Yanshan University, Qinhuangdao, PR China

## Abstract

In this paper, using the Lie group analysis method, we study the invariance properties of the time fractional fifth-order KdV equation. A systematic research to derive Lie point symmetries to time fractional fifth-order KdV equation is performed. In the sense of point symmetry, all of the vector fields and the symmetry reductions of the fractional fifth-order KdV equation are obtained. At last, by virtue of the sub-equation method, some exact solutions to the fractional fifth-order KdV equation are provided.

**Citation:** Wang Gw, Xu Tz, Feng T (2014) Lie Symmetry Analysis and Explicit Solutions of the Time Fractional Fifth-Order KdV Equation. PLoS ONE 9(2): e88336. doi:10.1371/journal.pone.0088336

**Editor:** Duccio Rocchini, Fondazione Edmund Mach, Research and Innovation Centre, Italy

**Received:** September 17, 2013; **Accepted:** January 7, 2014; **Published:** February 11, 2014

**Copyright:** © 2014 Wang et al. This is an open-access article distributed under the terms of the Creative Commons Attribution License, which permits unrestricted use, distribution, and reproduction in any medium, provided the original author and source are credited.

**Funding:** The project is supported by the National Natural Science Foundation of China (Grant No. 11171022). The funders had no role in study design, data collection and analysis, decision to publish, or preparation of the manuscript.

**Competing Interests:** The authors have declared that no competing interests exist.

\* E-mail: pukai1121@163.com

## Introduction

It is well known that the Lie symmetries, originally advocated by the Norwegian mathematician Sophus Lie in the beginning of the 19th century, are widely applied to investigate nonlinear differential equations (including multi-component systems of partial differential equations (PDEs) and ordinary differential equations (ODEs)), notably, for constructing their exact and explicit solutions. Considering the tangent structural equations under one or several parameter transformation groups is the basic idea of the Lie symmetry analysis. It has been showed that how the Lie symmetry analysis have been effectively used to look for exact and explicit solutions to both ODEs and PDEs. There are a lot of papers and many excellent books (see, e.g., [1–20] and papers cited therein) devoted to such applications. It is important to note, however, that a very small number of them involve Lie symmetries to solve problems for fractional differential equations (FDEs).

In recent years, the investigation of FDEs has gained much attention due to an exact description of complex nonlinear phenomena in various fields: systems identification, fluid flow, control problem, signal processing, viscoelastic materials, polymers, fluid mechanics, biology, physics, engineering and other areas of science [21–44]. In reality, the next state of a physical phenomenon might depend on not only its current state but also on its historical states (non-local property), which can be successfully modeled by using the theory of derivatives and integrals of fractional order [38]. Given a FDEs, there exists no well-defined method to analyze and study them systematically. Also, there is no general method for dealing with exact explicit solutions to FDEs. Consequently, many powerful methods have been established and developed to construct exact, explicit and numerical solutions of nonlinear FDEs, such as Adomian decomposition method [24,25], the invariant subspace method [26], transform method [27,28], homotopy perturbation method

[29], variational iteration method [30], sub-equation method [31–33], Lie symmetry group method [10–11,38,47–48] and so on.

In [10], the following time fractional fifth-order KdV equation

$$\frac{\partial^\alpha u}{\partial t^\alpha} = u_{xxxxx} + Mu^p u_x, \quad (1)$$

was investigated by means of the Lie symmetry group method. In this paper, we aim to extend Eq. (1) to the following time fractional fifth-order KdV equation

$$\frac{\partial^\alpha u}{\partial t^\alpha} = u_{xxxxx} + Mu^2 u_x + Nu_x u_{xx}, \quad (2)$$

where the term  $Nu_x u_{xx}$  is added to (1). Here  $0 < \alpha \leq 1$ ,  $N$  and  $M$  are constants. If  $\alpha = 1$ , this equation can be reduced to the general fifth-order KdV equation. When  $N = 0$ , (2) can be reduced to the special case of (1). These fifth-order KdV types of equations have been derived to model many physical phenomena [20]. Recently, the authors [10] studied the time fractional generalized fifth-order KdV equation by the group classification method, the symmetries, and other properties of the equations are investigated. However, the authors did not give exact solutions of (1). Unlike the previous work, this paper will extend the work in [10] and give some exact solutions of (2). It should be noted that the above equation have several arbitrary parameters, particularly, the fractional order  $0 < \alpha \leq 1$ , significantly affect the properties of the equation. Next, we can find that the parameters affect the symmetry and other properties of the equation, such as the symmetry reductions and so on.

Our aim in the present work is to discuss the time fractional fifth-order KdV equation by using the Lie symmetry group method. We get the corresponding infinitesimals, Lie algebra, and show that the time fractional fifth-order KdV equation can be

transformed into a nonlinear ODE of fractional order. The plan of the paper is as follows. Section 2 gives some basic notions about fractional calculus and discusses the Lie symmetry analysis of the FPDEs. Then in Section 3, we perform Lie group classification on the fractional fifth-order KdV equation. In particular, some exact solutions are obtained. Finally, we present conclusions in the last section.

## Preliminaries

In this section, we give some basic notions about fractional calculus, and then we discuss the Lie symmetry analysis method to fractional partial differential equations.

### 0.1 Notations About Fractional Calculus

Here we recall definition and basic results about the recent fractional calculus, for more details we refer to [39,40,42]. The modified Riemann-Liouville derivative is defined by Jumarie [39]

$$D_t^\alpha f(t) = \begin{cases} \frac{1}{\Gamma(1-\alpha)} \frac{d}{dt} \int_0^t (t-\zeta)^{-\alpha} (f(\zeta) - f(0)) d\zeta, & 0 < \alpha < 1, \\ [f^{(n)}(t)]^{(\alpha-n)}, & n \leq \alpha < n+1, n \geq 1. \end{cases} \quad (3)$$

Apart from the R-L definition of fractional derivatives, there are several other definitions, for instance the modified R-L (mR-L) derivative [37], the Grünwald-Letnikov derivative (G-L) and Caputo's fractional derivative [41,42], and so on. Under different circumstances, they can be used for handling different properties of physical models. For example, the Caputo's fractional derivative is related to initial value problems [45,46], on the contrary, the mR-L derivative is used to investigate exact and explicit solutions of some FDEs sometimes [31–33].

It is simple to prove the following properties of fractional derivatives and integrals (see e.g. [39,40]) that will be used in the analysis:

$$D_t^\alpha t^\gamma = \frac{\Gamma(\gamma+1)}{\Gamma(\gamma+1-\alpha)} t^{\gamma-\alpha}, \gamma > 0, \quad (4)$$

$$D_t^\alpha [u(t)v(t)] = u(t)D_t^\alpha v(t) + v(t)D_t^\alpha u(t), \quad (5)$$

$$D_t^\alpha [f(u(t))] = f'_u[u(t)]D_t^\alpha u(t) = D_u^\alpha f[u(t)](u_t)^\alpha. \quad (6)$$

### 0.2 Lie Symmetry Analysis Method to Fractional Partial Differential Equations

We recall the main idea of this method: consider a scalar evolution equation [10,38,47,48]

$$\frac{\partial^\alpha u}{\partial t^\alpha} = F[u]. \quad (7)$$

where  $u = u(x, t)$  and  $F[u]$  is a nonlinear differential operator.

The one-parameter Lie group of transformations

$$\begin{aligned} t^* &= t + \epsilon \tau(x, t, u) + O(\epsilon^2), \\ x^* &= x + \epsilon \xi(x, t, u) + O(\epsilon^2), \\ u^* &= u + \epsilon \eta(x, t, u) + O(\epsilon^2), \\ \frac{\partial^\alpha \bar{u}}{\partial \bar{t}^\alpha} &= \frac{\partial^\alpha u}{\partial t^\alpha} + \epsilon \eta_x^\alpha(x, t, u) + O(\epsilon^2), \\ \frac{\partial \bar{u}}{\partial \bar{x}} &= \frac{\partial u}{\partial x} + \epsilon \eta^x(x, t, u) + O(\epsilon^2), \\ \frac{\partial^2 \bar{u}}{\partial \bar{x}^2} &= \frac{\partial^2 u}{\partial x^2} + \epsilon \eta^{xx}(x, t, u) + O(\epsilon^2), \\ &\vdots \end{aligned} \quad (8)$$

where

$$\begin{aligned} \eta_x^\alpha &= \frac{\partial^\alpha \eta}{\partial t^\alpha} + (\eta_u - \alpha D_t(\tau)) \frac{\partial^\alpha u}{\partial t^\alpha} - u \frac{\partial^\alpha \eta_u}{\partial t^\alpha} + \mu \\ &+ \sum_{n=1}^{\infty} \left[ \binom{\alpha}{n} \frac{\partial^\alpha \eta_u}{\partial t^\alpha} - \binom{\alpha}{n+1} D_t^{n+1}(\tau) \right] D_t^{\alpha-n}(u) \\ &- \sum_{n=1}^{\infty} \binom{\alpha}{n} D_t^n(\xi) D_t^{\alpha-n}(u_x). \end{aligned} \quad (9)$$

here

$$\begin{aligned} \mu &= \sum_{n=2}^{\infty} \sum_{m=2}^n \sum_{k=2}^m \sum_{r=0}^{k-1} \binom{\alpha}{n} \binom{n}{m} \binom{k}{r} \frac{1}{k!} \\ &\frac{t^{n-\alpha}}{\Gamma(n+1-\alpha)} [-u]^r \frac{\partial^m}{\partial t^m} [u^{k-r}] \frac{\partial^{n-m+k} \eta}{\partial t^{n-m} \partial u^k}. \end{aligned} \quad (10)$$

$$\begin{aligned} \eta^x &= D_x(\eta) - u_x D_x(\xi) - u_t D_x(\tau), \\ \eta^{xx} &= D_x(\eta^x) - u_{xt} D_x(\tau) - u_{xx} D_x(\xi), \\ \eta^{xxx} &= D_x(\eta^{xx}) - u_{xxt} D_x(\tau) - u_{xxx} D_x(\xi), \\ \eta^{xxxx} &= D_x(\eta^{xxx}) - u_{xxx t} D_x(\tau) - u_{xxxx} D_x(\xi), \\ &\vdots \end{aligned} \quad (11)$$

Here,  $D_x$  denotes the total derivative operator and is defined by

$$D_x = \frac{\partial}{\partial x} + u_x \frac{\partial}{\partial u} + u_{xx} \frac{\partial}{\partial u_x} + \cdots \quad (12)$$

We consider the following general vector field:

$$V = \tau(x, t, u) \frac{\partial}{\partial t} + \xi(x, t, u) \frac{\partial}{\partial x} + \eta(x, t, u) \frac{\partial}{\partial u}. \quad (13)$$

If the vector field (13) generates a symmetry of (7), then  $V$  must satisfy Lie symmetry condition

$$pr^{(n)} V(\Delta_1)|_{\Delta_1=0} = 0, \quad (14)$$

where  $\Delta_1 = \frac{\partial^\alpha u}{\partial t^\alpha} - F[u]$ .

On the basis of the Lie theory, one can obtain

**Theorem.** A solution  $u = \theta(x, t)$  is an invariant solution of (7) if and only if

(i)  $u = \theta(x, t)$  is an invariant surface, in other words,

$$V\theta = 0 \Rightarrow \left( \tau(x, t, u) \frac{\partial}{\partial t} + \xi(x, t, u) \frac{\partial}{\partial x} + \eta(x, t, u) \frac{\partial}{\partial u} \right) \theta = 0,$$

(ii)  $u = \theta(x, t)$  is the solution of FPDE (7).

### 0.3 Time Fractional Fifth-order KdV Equation

In this part, we determine the invariance properties of the time fractional fifth-order KdV equation. Then we construct some exact solutions of the time fractional fifth-order equation.

According to the Lie theory and the Section 2, applying the fifth prolongation  $pr^{(5)}V$  to the Eq. (2), the invariance condition (2) is equivalent to the following equation:

$$\eta_\alpha^0 - \eta^{xxxxx} - Mu^2\eta^x - 2M\eta uu_x + N\eta^x u_{xx} + Nu_x\eta^{xx} = 0. \quad (15)$$

Substituting (9) and (11) into (15), and equating the coefficients of the various monomials in partial derivatives with respect to  $x$  and various power of  $u$ , we can get the determining equations for the symmetry group of the Eq. (2). Solving these equations, one can get.

$$\xi = c_1 x + c_2, \quad \tau = \frac{5c_1 t}{\alpha}, \quad \eta = -2c_1 u, \quad (16)$$

where  $c_1$  and  $c_2$  are arbitrary constants. Thus, we can get the corresponding vector fields

$$V = \frac{5c_1 t}{\alpha} \frac{\partial}{\partial t} + (c_1 x + c_2) \frac{\partial}{\partial x} - 2c_1 u \frac{\partial}{\partial u}. \quad (17)$$

Thus, infinitesimal generators of every one parameter Lie group of point symmetries of the (2) are:

$$V_1 = \frac{\partial}{\partial x}, \quad V_2 = \frac{5t}{\alpha} \frac{\partial}{\partial t} + x \frac{\partial}{\partial x} - 2u \frac{\partial}{\partial u}. \quad (18)$$

It is easily seen that the symmetry generators found in (18) form a closed Lie algebra

$$[V_1, V_2] = V_1, \quad [V_2, V_1] = -V_1. \quad (19)$$

For the operator  $V_2$  characteristic equation is

$$\frac{dx}{x} = \frac{\alpha dt}{5t} = \frac{-du}{2u}. \quad (20)$$

The corresponding invariants are

$$\xi = xt^{\frac{-\alpha}{5}}, \quad u = t^{\frac{-2\alpha}{5}} g(\xi). \quad (21)$$

From the above discussion, one can find that (2) can be reduced to a nonlinear ODE of fractional order with a new independent variable. Consequently, we have

**Theorem.** The transformation (21) reduces (1) to the following nonlinear ordinary differential equation of fractional order

$$\left( P_{\frac{5}{\alpha}}^{1-\frac{7\alpha}{5}, \alpha} g \right)(\xi) = g_{\xi\xi\xi\xi\xi} + Mg^2 g_\xi + Ng_\xi g_{\xi\xi}, \quad (22)$$

with the Erdelyi-Kober fractional differential operator  $P_\beta^{\tau, \alpha}$  of order [44]

$$(P_\beta^{\tau, \alpha} g)(\xi) = \prod_{j=0}^{n-1} \left( \tau + j - \frac{1}{\beta} \xi \frac{d}{d\xi} \right) (K_\beta^{\tau+\alpha, n-\alpha} g)(\xi), \quad (23)$$

$$n = \begin{cases} [\alpha] + 1, & \alpha \notin \mathbb{N}, \\ \alpha, & \alpha \in \mathbb{N}, \end{cases} \quad (24)$$

where

$$(K_\beta^{\tau, \alpha} g)(\xi) = \begin{cases} \frac{1}{\Gamma(\alpha)} \int_1^\infty (u-1)^{\alpha-1} u^{-(\tau+\alpha)} g(\xi u^{\frac{1}{\beta}}) du, & \alpha > 0, \\ g(\xi), & \alpha = 0 \end{cases} \quad (25)$$

is the Erdelyi-Kober fractional integral operator.

**Remark 1.** The proof is similar to Theorem 2 in [10].

**Remark 2.** Although the term  $Nu_x u_{xx}$  is added, the obtained point symmetries are the same as in [10].

**Remark 3.** Through the above discussion, one can find that the point symmetries of the time fractional equation are relatively narrower than those for generalized fifth-order KdV equation. The main reason is that the fractional order  $0 < \alpha < 1$  is an arbitrary parameter in our model.

### 0.4 Exact and Explicit Solutions of Time Fractional Fifth-order KdV Equation

**0.4.1 Summary of the method.** In this part, we deal with the explicit solutions of (2) by using the improved fractional sub-equation method.

For a given NFDEs [31–33, 47, 48], say, in two variables  $x$  and  $t$ ,

$$P(u, u_t, u_x, D_t^\alpha u, D_x^\alpha u, \dots) = 0, \quad 0 < \alpha \leq 1, \quad (26)$$

where  $D_x^\alpha u$  and  $D_t^\alpha u$  are the modified Riemann-Liouville derivatives of  $u$  with respect to  $t$  and  $x$ , respectively.

To determine  $u$  explicitly, one take the following steps:

**Step 1.** Using the variable transformation

$$u(x, t) = u(\xi), \quad \xi = x + ct + \xi_0, \quad (27)$$

where  $c$  is a nonzero constant to be determined later, the fractional differential equation (FDE) (26) is reduced to a nonlinear fractional ordinary differential equation (NFODE)

$$P(u, cu', u', c^\alpha D_\xi^\alpha u, D_\xi^\alpha u, \dots) = 0, \quad 0 < \alpha \leq 1. \quad (28)$$

**Step 2.** Suppose that Eq. (28) has the following solution:

$$u(\xi) = \sum_{i=1}^n a_i \left( \frac{D_\xi^\alpha \phi}{\phi} \right)^i + a_0, \quad (29)$$

where  $a_i (i=1 \dots n)$  are constants to be determined later, positive integer  $n$  can be determined by using Eq. (26) or (28) to balance the highest order derivatives and nonlinear terms and  $\phi(\xi)$  satisfies the following fractional Riccati equation:

$$D_\xi^\alpha \phi(\xi) = \sigma + \phi^2(\xi), \quad (30)$$

where  $\sigma$  is a constant. Eq. (30) have five solutions as follows:

$$\phi(\xi) = \begin{cases} -\sqrt{-\sigma} \tanh(-\sqrt{-\sigma}\xi, \alpha), & \sigma < 0, \\ -\sqrt{-\sigma} \coth(-\sqrt{-\sigma}\xi, \alpha), & \sigma < 0, \\ \sqrt{\sigma} \tan(\sqrt{\sigma}\xi, \alpha), & \sigma > 0, \\ -\sqrt{\sigma} \cot(\sqrt{\sigma}\xi, \alpha), & \sigma > 0, \\ -\frac{\Gamma(1+\alpha)}{\xi^\alpha + \omega}, & \omega \text{ is constant, } \sigma = 0, \end{cases} \quad (31)$$

with the generalized hyperbolic and trigonometric functions

$$\begin{aligned} \sin(\xi, \alpha) &= \frac{E_\alpha(i\xi^\alpha) - E_\alpha(-i\xi^\alpha)}{2i}, \quad \cos(\xi, \alpha) = \frac{E_\alpha(i\xi^\alpha) + E_\alpha(-i\xi^\alpha)}{2i}, \\ \sinh(\xi, \alpha) &= \frac{E_\alpha(\xi^\alpha) - E_\alpha(-\xi^\alpha)}{2}, \quad \cosh(\xi, \alpha) = \frac{E_\alpha(\xi^\alpha) + E_\alpha(-\xi^\alpha)}{2}, \\ \tan(\xi, \alpha) &= \frac{\sin(\xi, \alpha)}{\cos(\xi, \alpha)}, \quad \cot(\xi, \alpha) = \frac{\cos(\xi, \alpha)}{\sin(\xi, \alpha)}, \\ \tanh(\xi, \alpha) &= \frac{\sinh(\xi, \alpha)}{\cosh(\xi, \alpha)}, \quad \coth(\xi, \alpha) = \frac{\cosh(\xi, \alpha)}{\sinh(\xi, \alpha)}, \end{aligned} \quad (32)$$

here  $E_\alpha(\xi) = \sum_{k=0}^{\infty} \frac{\xi^k}{\Gamma(1+k\alpha)}$  ( $\alpha > 0$ ) is the Mittag-Leffler function in one parameter.

**Step 3.** Substituting (31) along with (29) into (28), we can get a polynomial in  $\left( \frac{D_\xi^\alpha \phi}{\phi} \right)^i$ . Setting the coefficients of the powers of  $\left( \frac{D_\xi^\alpha \phi}{\phi} \right)^i$  to be zero, one can obtain an over-determined nonlinear algebraic system in  $a_i (i=1 \dots n)$  and  $c$ .

**Step 4.** Assuming that the constants  $c, a_i (i=1 \dots n)$  can be obtained by solving the nonlinear algebraic system in Step 3, substituting these results and the solutions of Eq. (30) into (29), one can get the explicit solutions of Eq. (26) immediately.

**0.4.2 Applications to Time Fractional Fifth-order KdV Equation.** In this section, we apply the improved fractional sub-equation method for solving the FDEs (2).

According to above steps, we first introduce the following transformations:

$$u(x, t) = u(\xi), \quad \xi = x + ct, \quad (33)$$

where  $c$  is a constant. Substituting (33) into Eq. (2), then Eq. (2) can be reduced to the following NFODE:

$$c^\alpha D_\xi^\alpha u - Mu^2 u_\xi - Nu_\xi u_{\xi\xi} - u_{\xi\xi\xi\xi\xi} = 0. \quad (34)$$

Supposing that Eq. (34) has the following solution:

$$u(\xi) = a_0 + \sum_{i=1}^n a_i \left( \frac{D_\xi^\alpha \phi}{\phi} \right)^i, \quad (35)$$

where  $a_i (i=1 \dots n)$  are constants to be determined later. Balancing the highest order derivative terms with nonlinear terms in Eq. (34) yields the following ansatz,

$$u(\xi) = a_0 + a_1 \left( \frac{D_\xi^\alpha \phi}{\phi} \right) + a_2 \left( \frac{D_\xi^\alpha \phi}{\phi} \right)^2. \quad (36)$$

Substituting Eq. (36) along with Eq. (30) into Eq. (34) and then setting the coefficients of  $\left( \frac{D_\xi^\alpha \phi}{\phi} \right)^i$  to zero, one can obtain a set of algebraic equations about  $c, a_0, a_1, a_2$ . Solving the algebraic equations by Maple, we have

Case 1:

$$\begin{cases} M = M, N = -\frac{a_2^2 M + 360}{6a_2}, c = \left( \frac{16}{9} \sigma^2 (a_2^2 M + 144) \right)^{\frac{1}{2}}, \\ a_0 = -\frac{4}{3} \sigma a_2, a_1 = 0, a_2 = a_2, \alpha = \alpha, \sigma = \sigma. \end{cases} \quad (37)$$

Case 2:

$$\begin{cases} M = M, N = -7\sqrt{M}, c = (512\sigma^2)^{\frac{1}{2}}, \alpha = \alpha, \sigma = \sigma, \\ a_0 = -16\sigma\sqrt{\frac{1}{M}}, a_1 = 0, a_2 = 12\sqrt{\frac{1}{M}}. \end{cases} \quad (38)$$

Using (37), one can get new types of explicit solutions of Eq. (2) as follows:

$$u_1 = -\frac{10}{3} a_2 \sigma - a_2 \sigma (\coth^2(\sqrt{-\sigma}\xi, \alpha) + \tanh^2(\sqrt{-\sigma}\xi, \alpha)), \quad (39)$$

where  $\sigma < 0$ ,  $\xi = x + ct + \xi_0$ .

$$u_1 = \frac{2}{3} a_2 \sigma + a_2 \sigma (\cot^2(\sqrt{-\sigma}\xi, \alpha) + \tan^2(\sqrt{-\sigma}\xi, \alpha)), \quad (40)$$

where  $\sigma > 0$ ,  $\xi = x + ct + \xi_0$ .

$$u_1 = a_2 \frac{(\Gamma(1+\alpha))^2}{(\xi^\alpha + \omega)^2}, \quad (41)$$

where  $\sigma = 0$ ,  $\xi = x + ct + \xi_0$ .

Considering (38), one can get exact solutions of Eq. (2)

$$u_1 = -16\sigma\sqrt{\frac{1}{M}} - 12\sqrt{\frac{1}{M}}\sigma(\coth^2(\sqrt{-\sigma}\xi, \alpha) + \tanh^2(\sqrt{-\sigma}\xi, \alpha)), \quad (42)$$

where  $\sigma < 0$ ,  $\xi = x + ct + \xi_0$ .

$$u_1 = -16\sigma\sqrt{\frac{1}{M^a}} + 12\sqrt{\frac{1}{M}}\sigma(\cot^2(\sqrt{-\sigma}\xi, \alpha) + \tan^2(\sqrt{-\sigma}\xi, \alpha)), \quad (43)$$

where  $\sigma > 0$ ,  $\xi = x + ct + \xi_0$ .

$$u_1 = 12\sqrt{\frac{1}{M}} \frac{(\Gamma(1+\alpha))^2}{(\xi^\alpha + \omega)^2}, \quad (44)$$

where  $\sigma = 0$ ,  $\xi = x + ct + \xi_0$ .

## Conclusions

In this paper, the invariance properties of the time fractional fifth-order KdV equation are presented in the sense of point symmetry. All of the geometric vector fields and the symmetry reductions of the equation are obtained. And then, some exact solutions of the equation are constructed. The obtained solutions include generalized hyperbolic function solutions, generalized trigonometric function solutions and rational function solutions. These solutions can be further applied to deal with the nonlinear boundary-value problem, they also can be used to compare with the relevant numerical simulations. Furthermore, these solutions may be useful to further study the complicated nonlinear physical phenomena.

## Author Contributions

Wrote the paper: GwW TzX TF.

## References

- Olver PJ (1986) Application of Lie Group to Differential Equation. Springer, New York.
- Ovsiannikov LV (1982) Group Analysis of Differential Equations. Academic Press, New York.
- Lie S (1881) On integration of a class of linear partial differential equations by means of definite integrals. Arch. Math. VI (3) 328–368.
- Bluman GW, Kumei S (1989) Symmetries and Differential Equations. Springer, New York.
- Ibragimov NH, editor (1994) CRC Handbook of Lie Group Analysis of Differential Equations. Vols. 1–3, CRC Press, Boca Raton.
- Liu HZ, Geng YX (2013) Symmetry reductions and exact solutions to the systems of carbon nanotubes conveying fluid. J Differential Equations 254: 2289–2303.
- Sinkala W, Leach P, O'Hara J (2008) Invariance properties of a general-pricing equation. J Differential Equations 244: 2820–2835.
- Craddock M, Lennox K (2007) Lie group symmetries as integral transforms of fundamental solutions. J Differential Equations 232: 652–674.
- Craddock M, Lennox K (2012) Lie symmetry methods for multi-dimensional parabolic PDEs and diffusions. J Differential Equations 252: 56–90.
- Wang GW, Liu XQ, Zhang YY (2013) Lie symmetry analysis to the time fractional generalized fifth-order KdV equation. Commun. Nonlinear Sci Numer Simulat 18: 2321–2326.
- Liu HZ (2013) Complete group classifications and symmetry reductions of the fractional fifth-order KdV types of equations. Stud Appl Math DOI: 10.1111/sapm.12011.
- Kumar S, Singh K, Gupta RK (2012) Painlevé analysis, Lie symmetries and exact solutions for (2+1)-dimensional variable coefficients Broer-Kaup equations. Commun Nonlinear Sci Numer Simulat 17: 1529–1541.
- Vanceva O (2012) Lie symmetries and exact solutions of variable coefficient mKdV equations: An equivalence based approach. Commun Nonlinear Sci Numer Simulat 17: 611–618.
- Johnpillai AG, Khaliq CM (2010) Group analysis of KdV equation with time dependent coefficients. Appl Math Comput 216: 3761–3771.
- Naz R, Khan MD, Naeem I (2013) Conservation laws and exact solutions of a class of non linear regularized long wave equations via double reduction theory and Lie symmetries. Commun Nonlinear Sci Numer Simulat 18: 826–834.
- Listopadova V, Magdab O, Pobyzhc V (2013) How to find solutions, Lie symmetries, and conservation laws of forced Korteweg-de Vries equations in optimal way. Nonlinear Analysis: Real World Applications, 14: 202–205.
- Johnpillai AG, Karab AH, Biswas A (2013) Symmetry reduction, exact group-invariant solutions and conservation laws of the Benjamin-Bona-Mahoney equation. Appl Math Lett 26: 376–381.
- Jefferson GF (2013) On the second-order approximate symmetry classification and optimal systems of subalgebras for a forced Korteweg-de Vries equation. Commun Nonlinear Sci Numer Simul 18: 2340–2358.
- Johnpillai A, Khaliq CM (2011) Lie group classification and invariant solutions of mKdV equation with time-dependent coefficients. Commun Nonlinear Sci Numer Simul 16: 1207–1215.
- Liu H, Li J, Liu L (2010) Lie symmetry analysis, optimal systems and exact solutions to the fifth-order KdV types of equations. J Math Anal Appl 368: 551–558.
- Diethelm K (2010) The Analysis of Fractional Differential Equations. Springer.
- Liang YJ, Chen W (2013) A survey on numerical evaluation of Levy stable distributions and a new MATLAB toolbox. Signal Processing 93: 242–251.
- Hu S, Chen W, Gou X (2011) Modal analysis of fractional derivative damping model of frequency-dependent viscoelastic soft matter. Advances in Vibration Engineering 10: 187–196.
- El-Sayed AMA, Gaber M (2006) The Adomian decomposition method for solving partial differential equations of fractal order in finite domains. Phys Lett A 359: 175–182.
- Chen Y, An HL (2008) Numerical solutions of coupled Burgers equations with time- and space-fractional derivatives. Appl Math Comput 200: 87–95.
- Gazizov RK, Kasatkin AA (2013) Construction of exact solutions for fractional order differential equations by the invariant subspace method. Computers Mathematics with Applications 66: 576–584.
- Odiat B, Momani S (2008) A generalized differential transform method for linear partial differential equations of fractional order. Appl Math Lett 21: 194–199.
- Li X, Chen W (2010) Analytical study on the fractional anomalous diffusion in a half-plane. J Phys A: Math Theor 43: (49), 11.
- He JH (2000) A coupling method of a homotopy technique and a perturbation technique for non-linear problems. J Non-Linear Mech 35: 37–43.
- Wu G, Lee EWM (2010) Fractional variational iteration method and its application. Phys Lett A 374: 2506–2509.
- Zhang S, Zhang HQ (2011) Fractional sub-equation method and its applications to nonlinear fractional PDEs. Phys Lett A 375: 1069–1073.
- Guo S, Mei LQ, Li Y, Sun YF (2012) The improved fractional sub-equation method and its applications to the space-time fractional differential equations in fluid mechanics. Phys Lett A 376: 407–411.
- Lu B (2012) Bäcklund transformation of fractional Riccati equation and its applications to nonlinear fractional partial differential equations. Phys Lett A 376: 2045–2048.
- Gazizov RK, Kasatkin AA, Lukashchuk SY (2007) Continuous transformation groups of fractional differential equations, Vestnik. USATU 9: 125–135 (in Russian).
- Gazizov RK, Kasatkin AA, Lukashchuk SY (2009) Symmetry properties of fractional diffusion equations. Phys Scr T 136: 014016.
- Buckwar E, Luchko Y (1998) Invariance of a partial differential equation of fractional order under the Lie group of scaling transformations. J Math Anal Appl 227: 81–97.
- Djordjevic VD, Atanackovic TM (2008) Similarity solutions to nonlinear heat conduction and Burgers/Korteweg-CdeVries fractional equations. J Comput. Appl Math 212: 701–714.
- Sahadevan R, Bakkyaraj T (2012) Invariant analysis of time fractional generalized Burgers and Korteweg-de Vries equations. J Math Anal Appl 393: 341–347.
- Jumarie G (2006) Modified Riemann-Liouville derivative and fractional Taylor series of nondifferentiable functions further results. Comput Math Appl 51: 1367–1376.
- Jumarie G (2010) Cauchy's integral formula via the modified Riemann-Liouville derivative for analytic functions of fractional order. Appl Math Lett 23: 1444–1450.

41. Miller KS, Ross B (1993) An Introduction to the Fractional Calculus and Fractional Differential equations. Wiley, New York.
42. Podlubny I (1999) Fractional Differential Equations. Academic Press, San Diego, CA.
43. Oldham KB, Spanier J (1974) The Fractional Calculus. Academic Press.
44. Kiryakova V (1994) Generalised Fractional Calculus and Applications. in: Pitman Res. Notes in Math., vol. 301.
45. Jafari H, Daftardar-Gejji V (2006) Solving linear and nonlinear fractional diffusion and wave equations by Adomian decomposition. Appl Math Comput 180: 488–497.
46. Daftardar-Gejji V, Jafari H (2007) Solving a multi-order fractional differential equation using Adomian decomposition. Appl Math Comput 189: 541–548.
47. Wang GW, Xu TZ (2013) Symmetry properties and explicit solutions of the nonlinear time fractional KdV equation. Boundary Value Problems. 2013: 232.
48. Wang GW, Xu TZ (2013) Invariant analysis and exact solutions of nonlinear time fractional Sharma-Tasso-Olver equation by Lie group analysis. Nonlinear Dynamics. DOI: 10.1007/s11071-013-1150-y. In press.
